# Supplementary material for: Predicting increases in COVID-19 incidence to identify locations for targeted testing in West Virginia: A machine learning enhanced approach
Source: PubMed Central journal article supplement (PMC8565789; doi:10.1371/journal.pone.0259538), 2021-11-03
Supplement: pone.0259538.s001.pdf [file pone.0259538.s001.pdf]

1 **Distribution and expectation of daily incidence**

2 The daily incidence has a Poisson distribution with parameter  $\Lambda_t R_t$ .  $R_t$  is represented as a  
3 random variable following a gamma distribution with parameters  $a, b$ :

4 
$$P(k|R_t, \Lambda_t) = \frac{(\Lambda_t R_t)^k}{k!} e^{-\Lambda_t R_t}$$

5 
$$f(R_t|a, b) = \frac{1}{b^a \Gamma(a)} R^{a-1} e^{-\frac{R}{b}}$$

6 where  $\Gamma(a)$  is the usual Gamma function defined as:

7 
$$\Gamma(z) = \int_0^\infty t^{z-1} e^{-t} dt \rightarrow \Gamma(n + 1) = n! \text{ (if } n \text{ is a positive integer)}$$

8 
$$\Gamma(z + 1) = z\Gamma(z)$$

9

10 Denote by  $C_{a,b}$  the normalization constant for the Gamma distribution:

11 
$$\frac{1}{C_{a,b}} = \int_0^\infty dR R^{a-1} e^{-\frac{R}{b}} = b^a \int_0^\infty du u^{a-1} e^{-u} = b^a \Gamma(a)$$

12 
$$C_{a,b} = \frac{1}{b^a \Gamma(a)}$$

13 
$$C_{a+1,b} = \frac{1}{b^{a+1} \Gamma(a + 1)} = \frac{1}{ab} C_{a,b}$$

14

15 The PMF of the expected number of cases is obtained by integrating over the values of  $R_t$ :

$$16 \quad P(k|\Lambda_t, a, b) = \int_0^{\infty} dR \frac{(\Lambda_t R)^k}{k!} e^{-\Lambda_t R} \cdot C_{a,b} \cdot R^{a-1} e^{-\frac{R}{b}}$$

17 The integrand is proportional to a gamma distribution with parameters  $a' = a + k$ ,  $\frac{1}{b'} = \frac{1}{b} + \Lambda_t$

$$18 \quad P(k) = \frac{\Lambda_t^k C_{a,b}}{k!} \int_0^{\infty} dR R^{k+a-1} e^{-R(\Lambda_t + \frac{1}{b})} = C_{a,b} \frac{\Lambda_t^k}{k!} \frac{\Gamma(a+k)}{(\Lambda_t + \frac{1}{b})^{a+k}} = \frac{(\Lambda_t b)^k}{(\Lambda_t b + 1)^{a+k}} \cdot \frac{\Gamma(a+k)}{k! \Gamma(a)}$$

19 Or (use  $\Gamma(z+1) = z\Gamma(z)$ )

$$20 \quad P(k|a, b) = \frac{1}{(b\Lambda_t + 1)^a} \left( \frac{b\Lambda_t}{b\Lambda_t + 1} \right)^k \prod_{j=1}^k \frac{(a+j)}{j}$$

21

22 The expected number of new infections follows from working out the Gamma-Poisson  
23 distribution and coincides with the infection potential multiplied by the expected  $R$

$$24 \quad \langle I_t \rangle = \Lambda_t R_t \rightarrow \langle \langle I_t \rangle (R_t) \rangle_{R_t} = \Lambda_t \langle R_t \rangle = \Lambda_t a b$$

$$25 \quad \langle I \rangle = \sum_{k=1}^{\infty} k \int_0^{\infty} dR \frac{(\Lambda_t R)^k}{k!} e^{-\Lambda_t R} \cdot C_{a,b} \cdot R^{a-1} e^{-\frac{R}{b}} = \int_0^{\infty} dR \Lambda_t R \sum_{\ell=0}^{\infty} \frac{(\Lambda_t R)^{\ell}}{\ell!} e^{-\Lambda_t R} \cdot C_{a,b} \cdot R^{a-1} e^{-\frac{R}{b}} = \Lambda_t C_{a,b} \int_0^{\infty} dR \cdot R^a e^{-\frac{R}{b}}$$

26
